# Supplementary material
Source: PubMed Central journal article supplement (PMC4317530)
Supplement: mmc1.pdf [file mmc1.pdf]

SUPPLEMENTARY INFORMATION

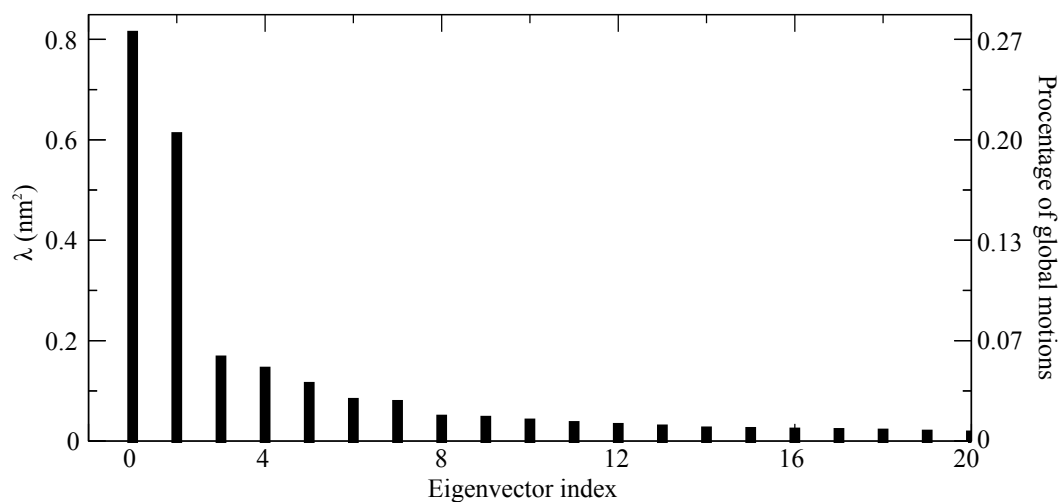

Figure S1: 20 largest eigenvalues from PCA of the kinase domain  $C_{\alpha}$  atoms as observed for the apo-state. The first two eigenvectors account for about 45% of the global protein motion.

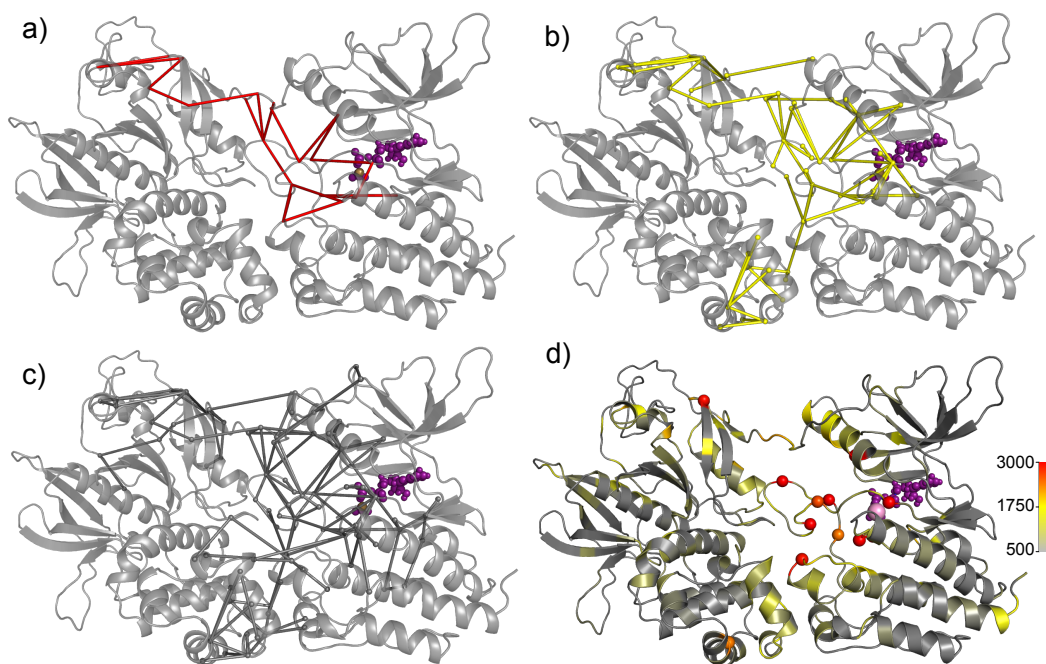

Figure S2: Force distribution upon ATP binding. (a-c) The network of force differences between apo-FK and FK-ATP state simulations is shown as sticks. Only the networks of forces connecting more than 5 residues are shown. ATP (*purple*) is shown at a representative position, as observed during the simulations. The different colors of sticks indicate different force cutoffs, namely at a) 500 pN. b) 300 pN and c) 200 pN. d) Difference of punctual stress, the sum of force differences acting on a given residue. Residues with stresses  $> 3000$  pN are shown as spheres.

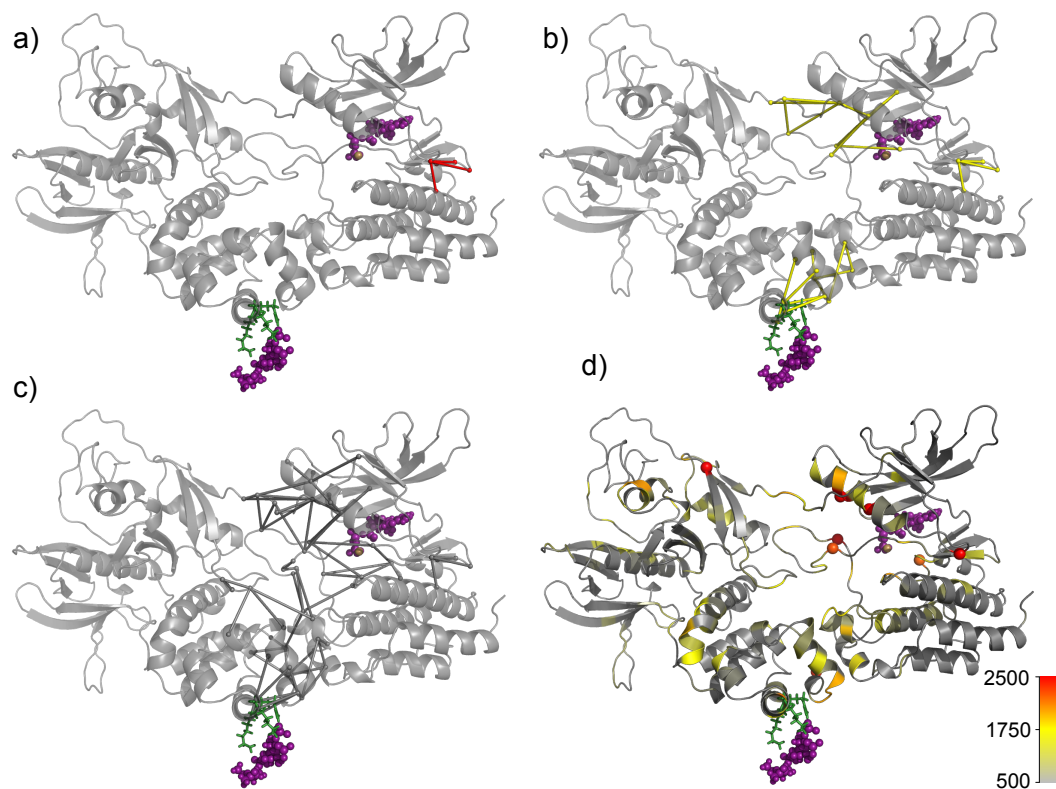

Figure S3: Force distribution upon PIP<sub>2</sub> binding. (a-c) The network of force differences between FK-ATP and FK-ATP-PIP<sub>2</sub> state simulations is shown as sticks. Only the networks of forces connecting more than 5 residues are shown. ATP and PIP<sub>2</sub> (*purple*) are shown at representative position, as observed during the simulations. The different colors of sticks indicate different force cutoffs, namely at a) 350 pN, b) 300 pN and c) 200 pN. d) Difference of punctual stress, the sum of force differences acting on a given residue. Residues with stresses > 3000 pN are shown as spheres.

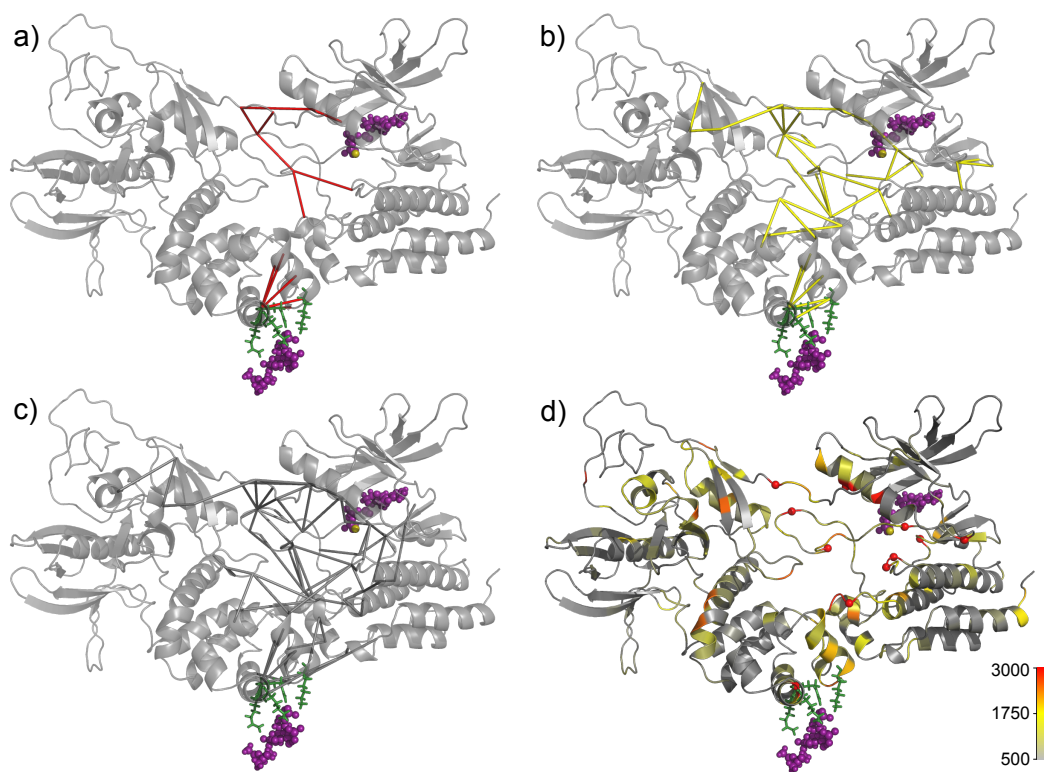

Figure S4: Force distribution upon ATP and PIP<sub>2</sub> binding. (a-c) The network of force differences between apo-FK and FK-ATP-PIP<sub>2</sub> state simulations is shown as sticks. Only the networks of forces connecting more than 5 residues are shown. ATP and PIP<sub>2</sub> (purple) are shown at representative positions, as observed during the simulations. The different colors of sticks indicate different force cutoffs, namely at a) 500 pN. b) 300 pN. c) 200 pN. d) Difference of punctual stress, the sum of force differences acting on a given residue. Residues with stresses > 3000 pN are shown as spheres.

Table S1: Average residue pairwise forces within connected networks upon ATP and PIP<sub>2</sub> binding as pointed out by FDA and as shown in Fig. 4, S2 and S3. Residue pairs with a change > 250 pN upon ATP binding and a reverse change of > 250 pN upon PIP<sub>2</sub> binding are marked in red and highlighted in Fig. 4 c. All of them except one are saltbridges.

| Residue pair |      | APO (pN) | ATP (pN) | ATP-PIP <sub>2</sub> (pN) | Residue pair |      | APO (pN) | ATP (pN) | ATP-PIP <sub>2</sub> (pN) |
|--------------|------|----------|----------|---------------------------|--------------|------|----------|----------|---------------------------|
| R35          | D60  | -559     | -937     | -403                      | E404         | R569 | -104     | -447     | -195                      |
| R35          | R108 | 637      | 1014     | 796                       | K454         | E471 | -538     | -941     | -630                      |
| R35          | E109 | -7       | -988     | -114                      | K454         | K581 | 1.473    | 322      | 3                         |
| R35          | E112 | -829     | -1179    | -1082                     | K467         | E403 | -258     | -489     | -14                       |
| R35          | E118 | -885     | -8       | -330                      | K467         | E471 | -108     | -418     | -757                      |
| R35          | D395 | 0        | -351     | -105                      | K467         | K578 | 266      | 554      | 125                       |
| K38          | E403 | -785     | -26      | -9                        | E471         | Q470 | 270      | 582      | 378                       |
| R57          | D462 | -635     | -50      | 0                         | E471         | D564 | 16       | 413      | 378                       |
| D60          | R108 | -552     | -234     | -668                      | E471         | R569 | -952     | -74      | -682                      |
| D60          | E109 | 15       | 521      | 232                       | E471         | K581 | 0        | -845     | 2                         |
| D60          | D395 | 1        | 400      | 245                       | H482         | Q529 | 91       | 49       | 773                       |
| E109         | E112 | 130      | 458      | 168                       | H482         | D558 | 32       | -62      | 481                       |
| E118         | K38  | -185     | -1272    | -1144                     | H482         | C559 | 64       | 6        | 1084                      |
| R177         | E182 | -174     | -620     | -410                      | H482         | V560 | -124     | -67      | 1352                      |
| R177         | R184 | 120      | 466      | 173                       | R545         | E572 | -126     | -1038    | -1094                     |
| E182         | M183 | 636      | 309      | 300                       | D546         | K583 | -779     | -1675    | -1158                     |
| E182         | R184 | -649     | -943     | -546                      | D564         | H544 | -80      | 256      | 194                       |
| E182         | R597 | -502     | -176     | -397                      | D564         | D546 | 677      | 2231     | 2381                      |
| R184         | K190 | 164      | 10       | 319                       | D564         | R550 | -986     | -528     | -324                      |
| R184         | E636 | -367     | -76      | -693                      | D564         | F565 | 391      | -37      | 111                       |
| E189         | R221 | -6       | -546     | -650                      | D564         | K583 | -222     | -557     | -412                      |
| E189         | K222 | -109     | -419     | -294                      | R569         | D405 | -202     | -725     | -765                      |
| E189         | R229 | -915     | -477     | -675                      | E572         | Y570 | -289     | 135      | 105                       |
| K190         | E592 | -799     | -563     | -37                       | E572         | D573 | 400      | 725      | 681                       |
| K191         | K218 | 155      | 143      | 475                       | K578         | E404 | -4       | -669     | -905                      |
| K191         | R221 | 339      | 455      | 858                       | K578         | E572 | -1215    | 6        | 1                         |
| R221         | E195 | -1109    | -505     | -151                      | K578         | Y576 | 120      | 583      | 604                       |
| R221         | E198 | -1178    | -479     | -168                      | K578         | S580 | 361      | -32      | -1                        |
| R221         | K199 | 608      | 174      | 73                        | L580         | A579 | -190     | 178      | 112                       |
| R221         | K222 | 488      | 671      | 1277                      | K581         | D564 | -8       | -542     | -2                        |
| D395         | R57  | 0        | -405     | -393                      | K583         | R550 | 492      | 1166     | 475                       |
| D395         | D63  | 532      | 119      | 22                        | R597         | R545 | -9       | 540      | 316                       |
| D402         | K467 | -1068    | -620     | -44                       | R597         | E572 | -32      | -874     | -568                      |
| D402         | K578 | -136     | -1193    | -1248                     | R597         | D573 | -1025    | -439     | -663                      |
| E403         | D402 | 609      | 916      | 664                       | R597         | T575 | 309      | -3       | -3                        |
| E403         | K578 | -3       | -723     | -358                      | E636         | E592 | 458      | 365      | 61                        |

Table S2: Data collection and refinement statistics for K-FAK structures.

| PDB code                                            | 4D4Y                                                                  | 4D55                             | 4D4S                                                                  | 4D58                                                     |
|-----------------------------------------------------|-----------------------------------------------------------------------|----------------------------------|-----------------------------------------------------------------------|----------------------------------------------------------|
| <b>Data collection</b>                              |                                                                       |                                  |                                                                       |                                                          |
| Space group                                         | P2 <sub>1</sub>                                                       | P2 <sub>1</sub>                  | P2 <sub>1</sub>                                                       | P2 <sub>1</sub>                                          |
| <b>Cell dimensions</b>                              |                                                                       |                                  |                                                                       |                                                          |
| <i>a</i> , <i>b</i> , <i>c</i> (Å)                  | 44.90, 122.99, 50.83                                                  | 45.01, 44.49, 66.99              | 45.27, 124.88, 50.81                                                  | 44.98, 123.37, 50.84                                     |
| $\alpha$ , $\beta$ , $\gamma$ (°)                   | 90.00, 94.94, 90.00                                                   | 90.0, 95.0, 90.0                 | 90.00, 93.33, 90.00                                                   | 90.00, 94.65, 90.00                                      |
| Resolution (Å)*                                     | 61.49–1.8<br>(1.9–1.8)                                                | 66.73–2.3<br>(2.42–2.3)          | 62.44–2.0<br>(2.11– 2.0)                                              | 61.68 –1.95<br>(2.06 – 1.95)                             |
| <i>R</i> <sub>sym</sub> *                           | 4.1 (36.3)                                                            | 4.6 (26.1)                       | 4.4 (35.5)                                                            | 4.1 (31.5)                                               |
| <i>I</i> / $\sigma$ ( <i>I</i> )*                   | 11.8 (2.0)                                                            | 11.2 (2.9)                       | 12.7 (2.1)                                                            | 11.2 (2.2)                                               |
| Completeness (%)*                                   | 97.3 (96.0)                                                           | 99.9 (99.8)                      | 99.9 (99.9)                                                           | 99.9 (100.0)                                             |
| Redundancy *                                        | 4.3 (4.4)                                                             | 3.8 (3.8)                        | 4.8 (4.7)                                                             | 3.8 (3.7)                                                |
| <b>Refinement</b>                                   |                                                                       |                                  |                                                                       |                                                          |
| Resolution (Å)                                      | 61.49 –1.8                                                            | 44.88 – 2.3                      | 62.44 – 2.0                                                           | 61.68 –1.95                                              |
| No. reflections                                     | 46837                                                                 | 11320                            | 36003                                                                 | 38091                                                    |
| <i>R</i> <sub>work</sub> / <i>R</i> <sub>free</sub> | 18.68/22.67                                                           | 19.83/25.71                      | 20.6/22.5                                                             | 19.56/22.85                                              |
| <b>No. atoms</b>                                    |                                                                       |                                  |                                                                       |                                                          |
| Protein                                             | 4176                                                                  | 2105                             | 4146                                                                  | 4167                                                     |
| Ligand                                              | 24                                                                    | 5                                | 61                                                                    | 48                                                       |
| Water                                               | 230                                                                   | 58                               | 148                                                                   | 185                                                      |
| <b>Average B-factor</b>                             | 32.0                                                                  | 47.0                             | 41.4                                                                  | 34.9                                                     |
| <b>Name of ligands</b>                              | DMSO and (SO <sub>4</sub> ) <sup>2-</sup>                             | (SO <sub>4</sub> ) <sup>2-</sup> | (SO <sub>4</sub> ) <sup>2-</sup> and TAE226 <sup>†</sup>              | (SO <sub>4</sub> ) <sup>2-</sup> and TAE226 <sup>†</sup> |
| <b>R.m.s deviation</b>                              |                                                                       |                                  |                                                                       |                                                          |
| Bond lengths (Å)                                    | 0.0102                                                                | 0.0095                           | 0.005                                                                 | 0.0086                                                   |
| Bond angles (°)                                     | 1.386                                                                 | 1.334                            | 1.049                                                                 | 1.267                                                    |
| PDB code                                            | 4D4V                                                                  | 4D4R                             | 4D5H                                                                  | 4D5K                                                     |
| <b>Data collection</b>                              |                                                                       |                                  |                                                                       |                                                          |
| Space group                                         | P2 <sub>1</sub>                                                       | I <sub>2</sub>                   | P2 <sub>1</sub>                                                       | P2 <sub>1</sub>                                          |
| <b>Cell dimensions</b>                              |                                                                       |                                  |                                                                       |                                                          |
| <i>a</i> , <i>b</i> , <i>c</i> (Å)                  | 45.00, 123.60, 51.01                                                  | 115.76, 44.81, 118.08            | 44.89, 123.59, 50.80                                                  | 44.93, 122.85, 50.88                                     |
| $\alpha$ , $\beta$ , $\gamma$ (°)                   | 90.00, 94.49, 90.00                                                   | 90.00, 106.54, 90.00             | 90.00, 95.00, 90.00                                                   | 90.00, 94.75, 90.00                                      |
| Resolution (Å)*                                     | 50.85 – 2.1<br>(2.21–2.10)                                            | 56.60 – 1.55<br>(1.63 – 1.55)    | 61.79 – 1.75<br>(1.84 – 1.75)                                         | 61.43 – 1.75<br>(1.84 – 1.75)                            |
| <i>R</i> <sub>sym</sub> *                           | 3.2 (17.6)                                                            | 3.6 (34.5)                       | 3.4 (37.2)                                                            | 3.4 (33.6)                                               |
| <i>I</i> / $\sigma$ ( <i>I</i> )*                   | 15.6 (4.3)                                                            | 7.9 (2.2)                        | 11.8 (2.1)                                                            | 9.1 (2.3)                                                |
| Completeness (%)*                                   | 100.0 (100.0)                                                         | 99.9 (100.0)                     | 99.9 (99.9)                                                           | 97.7 (91.4)                                              |
| Redundancy*                                         | 4.3 (4.3)                                                             | 4.1 (4.1)                        | 3.8 (3.9)                                                             | 3.8 (3.5)                                                |
| <b>Refinement</b>                                   |                                                                       |                                  |                                                                       |                                                          |
| Resolution (Å)                                      | 50.85 – 2.1                                                           | 56.49 – 1.55                     | 50.66 – 1.75                                                          | 61.43 – 1.75                                             |
| No. reflections                                     | 30740                                                                 | 80385                            | 52597                                                                 | 51212                                                    |
| <i>R</i> <sub>work</sub> / <i>R</i> <sub>free</sub> | 19.2/22.7                                                             | 20.1/22.1                        | 18.14/20.50                                                           | 18.91/21.44                                              |
| <b>No. atoms</b>                                    |                                                                       |                                  |                                                                       |                                                          |
| Protein                                             | 4105                                                                  | 4200                             | 4207                                                                  | 4162                                                     |
| Ligand                                              | 53                                                                    | 12                               | 39                                                                    | 24                                                       |
| Water                                               | 134                                                                   | 330                              | 215                                                                   | 218                                                      |
| <b>Name of ligand</b>                               | DMSO, (SO <sub>4</sub> ) <sup>2-</sup><br>and compound A <sup>‡</sup> | (SO <sub>4</sub> ) <sup>2-</sup> | DMSO, (SO <sub>4</sub> ) <sup>2-</sup><br>and compound B <sup>§</sup> | DMSO and (SO <sub>4</sub> ) <sup>2-</sup>                |
| <b>Average B-factor</b>                             | 46.7                                                                  | 26.0                             | 33.7                                                                  | 33.7                                                     |
| <b>R.m.s deviation</b>                              |                                                                       |                                  |                                                                       |                                                          |
| Bond lengths (Å)                                    | 0.008                                                                 | 0.0058                           | 0.0094                                                                | 0.0096                                                   |
| Bond angles (°)                                     | 1.231                                                                 | 1.148                            | 1.312                                                                 | 1.330                                                    |

\*Highest resolution range shown in parentheses

<sup>†</sup>a.k.a 2-[[5-chloro-2-(2-methoxy-4-morpholin-4-ylanilino)pyrimidin-4-yl]amino]-N-methylbenzamide

<sup>‡</sup>6-methyl-4-(piperazin-1-yl)-2-(trifluoromethyl)quinoline

<sup>§</sup>6-methyl-5-[3-(trifluoromethyl)phenyl]amino-2,3-dihydro-1,2,4-triazin-3-one
